# 1                    **Evolution of the nitric oxide synthase family in vertebrates** 2                    **and novel insights in gill development**

3  
4                    Giovanni Annona<sup>1</sup>, Iori Sato<sup>2</sup>, Juan Pascual-Anaya<sup>3,†</sup>, Ingo Braasch<sup>4</sup>, Randal Voss<sup>5</sup>,  
5                    Jan Stundl<sup>6,7,8</sup>, Vladimir Soukup<sup>6</sup>, Shigeru Kuratani<sup>2,3</sup>,  
6                    John H. Postlethwait<sup>9</sup>, Salvatore D'Aniello<sup>1,\*</sup>  
7

8                    <sup>1</sup> Biology and Evolution of Marine Organisms, Stazione Zoologica Anton Dohrn, 80121,  
9                    Napoli, Italy

10                    <sup>2</sup> Laboratory for Evolutionary Morphology, RIKEN Center for Biosystems Dynamics  
11                    Research (BDR), Kobe, 650-0047, Japan

12                    <sup>3</sup> Evolutionary Morphology Laboratory, RIKEN Cluster for Pioneering Research (CPR), 2-2-  
13                    3 Minatojima-minami, Chuo-ku, Kobe, Hyogo, 650-0047, Japan

14                    <sup>4</sup> Department of Integrative Biology and Program in Ecology, Evolution & Behavior (EEB),  
15                    Michigan State University, East Lansing, MI 48824, USA

16                    <sup>5</sup> Department of Neuroscience, Spinal Cord and Brain Injury Research Center, and  
17                    Ambystoma Genetic Stock Center, University of Kentucky, Lexington, Kentucky, USA

18                    <sup>6</sup> Department of Zoology, Faculty of Science, Charles University in Prague, Prague, Czech  
19                    Republic

20                    <sup>7</sup> Division of Biology and Biological Engineering, California Institute of Technology,  
21                    Pasadena, CA, USA

22                    <sup>8</sup> South Bohemian Research Center of Aquaculture and Biodiversity of Hydrocenoses,  
23                    Faculty of Fisheries and Protection of Waters, University of South Bohemia in Ceske  
24                    Budejovice, Vodnany, Czech Republic

25                    <sup>9</sup> Institute of Neuroscience, University of Oregon, Eugene, OR 97403, USA

26                    † Present address: Department of Animal Biology, Faculty of Sciences, University of  
27                    Málaga; and Andalusian Centre for Nanomedicine and Biotechnology (BIONAND),  
28                    Málaga, Spain

29  
30                    \* Correspondence: [salvatore.daniello@szn.it](mailto:salvatore.daniello@szn.it)  
31  
32

33 **ORCID**

34 GA: 0000-0001-7806-6761

35 JPA: 0000-0003-3429-9453

36 IB: 0000-0003-4766-611X

37 JS: 0000-0002-3740-3378

38 VS: 0000-0002-1914-283X

39 SK: 0000-0001-9717-7221

40 JHP: 0000-0002-5476-2137

41 SDA: 0000-0001-7294-1465

42

43

44

45

46

47

48

49

50

51

52

53

54

55

56

57

## 58 **Abstract**

59 Nitric oxide (NO) is an ancestral key signaling molecule essential for life and has  
60 enormous versatility in biological systems, including cardiovascular homeostasis,  
61 neurotransmission, and immunity. Although our knowledge of nitric oxide synthases (Nos),  
62 the enzymes that synthesize NO *in vivo*, is substantial, the origin of a large and diversified  
63 repertoire of *nos* gene orthologs in fish with respect to tetrapods remains a puzzle. The  
64 recent identification of *nos3* in the ray-finned fish spotted gar, which was considered lost in  
65 the ray-finned fish lineage, changed this perspective. This prompted us to explore *nos*  
66 gene evolution and expression in depth, surveying vertebrate species representing key  
67 evolutionary nodes. This study provides noteworthy findings: first, *nos2* experienced  
68 several lineage-specific gene duplications and losses. Second, *nos3* was found to be lost  
69 independently in two different teleost lineages, Elopomorpha and Clupeocephala. Third,  
70 the expression of at least one *nos* paralog in the gills of developing shark, bichir, sturgeon,  
71 and gar but not in arctic lamprey, suggest that *nos* expression in this organ likely arose in  
72 the last common ancestor of gnathostomes. These results provide a framework for  
73 continuing research on *nos* genes' roles, highlighting subfunctionalization and reciprocal  
74 loss of function that occurred in different lineages during vertebrate genome duplications.

75

76

77

78

79

80

81 **Keywords:** Vertebrate evolution; Genome duplication; Gene duplication and loss; NOS;  
82 Phylogenomics; Synteny.

## 83 Introduction

84 Originally classified as a pollutant, nitric oxide (NO) was recognized as “Molecule of the  
85 Year” in 1992 [1] when its important role as a cellular signaling molecule was recognized.  
86 NO plays a role in a myriad of physiological processes, such as cardiovascular  
87 homeostasis [2], neurotransmission [3], immune response [4], and in pathological  
88 conditions such as neurodegenerative diseases [5] and cancer [6].

89 Nitric oxide synthase (Nos), the enzyme catalysing the biosynthesis of NO *in vivo*, is  
90 ubiquitous among organisms, including protists and bacteria [7,8]. Three *nos* gene  
91 paralogs have been described in vertebrates: two constitutively expressed genes,  
92 including *nos1* (also known as *neuronal nos*, or *nNos*), which represents the predominant  
93 source of NO involved in neurogenesis and neurotransmission [9,10], and *nos3*  
94 (*endothelial nos* or *eNos*) implicated in angiogenesis and blood pressure control in  
95 vascular endothelial cells [11,12]. In addition, *nos2* (*inducible nos* or *iNos*), which  
96 expression is instead evoked by proinflammatory cytokines, is promptly activated in a  
97 range of acute stress responses [13].

98 Although the availability of current genomic data covers all major ray-finned fish lineages,  
99 the evolutionary history of their *nos* gene repertoire remains puzzling. Previous studies  
100 reported a variable number of *nos* genes in teleost fishes: *nos1* is always present in a  
101 single copy; *nos2* either in one or two copies, probably due to the additional teleost-  
102 specific whole-genome duplication (TGD) [14–17], or absent as observed in several  
103 species. On the other hand, *nos3* has been reported as missing in the genomes of ray-  
104 finned fish. This apparent gene loss contrasts with literature describing a putative Nos3-  
105 like protein localized by antibody stains in gills and vascular endothelium of several teleost  
106 species [18,19]. The discovery of a *nos3* ortholog in the spotted gar *Lepisosteus oculatus*,  
107 a holostean fish (the sister group of teleosts within the ray-finned lineage) [20], and the



108 variable number of teleost *nos2* genes raises new questions about the evolution of this  
109 important gene family, including: *i.* is our current view on the origin and evolution of *nos*  
110 gene family in vertebrates accurate?; and *ii.* can further investigation of *nos* expression  
111 pattern in fish retaining a *nos3* copy reveal novel functional insights? In an attempt to  
112 answer these questions, we have studied the Nos family repertoire at unprecedented  
113 phylogenetic resolution, investigated conserved synteny in fish genomes, and studied  
114 the expression pattern of all three *nos* genes during development in multiple species  
115 representing key nodes in vertebrate evolution.

116

## 117 **Results**

### 118 **Revised evolutionary history of Nos2 and Nos3**

119 Gaps in our current knowledge of Nos family evolution include the time of origin of the  
120 three distinct paralogous *nos* genes and when some of them were secondarily lost in  
121 specific lineages. Using sequences retrieved from public genomic and transcriptomic  
122 databases, we reconstructed a Nos phylogeny using 108 protein sequences from 53  
123 species (see Supplementary Table 1). Species were chosen to provide a broad  
124 representation of aquatic vertebrates: cyclostomes (modern jawless fish), chondrichthyans  
125 (cartilaginous fish), and osteichthyes (bony fish) including ray- and lobe-finned fishes.  
126 Lobe-finned fishes include coelacanth, lungfishes, and tetrapods; Ray-finned fishes  
127 comprise the non-teleost lineages of polypteriformes (e.g. bichir), acipenseriformes (e.g.  
128 sterlet sturgeon), holosteans (lepisosteiformes, e.g. spotted gar, and amiiformes, e.g.  
129 bowfin), and the teleosts, subdivided into three major living lineages: osteoglossomorphs  
130 (e.g. arowana, mooneyes, and the freshwater elephantfish), elopomorphs (e.g. eels and  
131 relatives) and clupeocephalans (e.g. zebrafish and medaka) (see [21] for a recent  
132 phylogeny of ray-finned fishes).

133 Our phylogenetic analysis confirmed that *Nos1* is present in all species of jawed  
134 vertebrates examined (Fig. 1a, green shading). In contrast, most fish lineages retained  
135 *Nos2*, including chondrichthyans (*Callorhinchus milii*, *Rhincodon typus*, *Chiloscyllium*  
136 *punctatum*, and *Scyliorhinus torazame*), polypteriformes (*Polypterus senegalus*,  
137 *Erpetoichthys calabaricus*), acipenseriformes (*Acipenser ruthenus*), holosteans (*Amia*  
138 *calva*, *Lepisosteus oculatus*), elopomorphs (*Megalops cyprinoides*), osteoglossomorphs  
139 (*Paramormyrops kingsleyae*, *Scleropages formosus*) and coelacanthiformes (*Latimeria*  
140 *chalumnae*) (Fig. 1a, grey shading), although a *nos2* gene loss event occurred at the stem  
141 of Neoteleostei (Fig. 1b), since this gene has not been found in any available genome from  
142 this clade. On the other hand, our phylogenetic analysis highlights the occurrence of extra  
143 *nos2* duplicates in several lineages, for which we adopted a specific nomenclature: in the  
144 zebrafish *Danio rerio* there are two *nos2* genes, *nos2a* and *nos2b*, while in the goldfish  
145 *Carassius auratus*, the blind golden-line barbel *Sinocyclocheilus anshuiensis* and the  
146 common carp *Cyprinus carpio* we found three: *nos2a*, *nos2ba*, and *nos2bb*; in salmonids  
147 (*Salmo salar* and *Oncorhynchus mykiss*) there are two different copies of *nos2*, named  
148 *nos2 $\alpha$*  and *nos2 $\beta$* ; and last, we named *nos2.1* and *nos2.2* the two *nos2* paralogs that we  
149 found in a characid (the Mexican tetra *Astyanax mexicanus*), a gymnotid (the electric eel  
150 *Electrophorus electricus*), an ictalurid (the channel catfish *Ictalurus punctatus*), an esocid  
151 (the northern pike *Esox lucius*), and a clupeid (the Atlantic herring *Clupea harengus*) (Fig.  
152 1a, grey shading). Our nomenclature is based both on the phylogenetic analysis and a  
153 synteny conservation analysis (see below and in the Discussion section).

154 *Nos3* deserves special attention since it was previously believed that a loss event  
155 predated the lineage of actinopterygians or alternatively that it represents an innovation of  
156 tetrapods [8]. Nevertheless, this latter hypothesis may have been overinterpreted since  
157 few ray-finned genome sequences were originally available. The only actinopterygian *nos3*

158 gene reported thus far is in the spotted gar [20]. Here we report the identification of *nos3*  
159 genes in genomes of the bichir *P. senegalus*, the sterlet sturgeon *A. ruthenus* [22], the  
160 bowfin *A. calva* [23], and the freshwater elephantfish *P. kingsleyae* [24] (Fig. 1a, red  
161 shading). The absence of *nos3* in all available clupeocephalans indicates a gene loss  
162 event in the stem of this group (Fig. 1c). Furthermore, we did not find *nos3* in the tarpon *M.*  
163 *cyprinoides*, the most complete genome available among Elopomorpha, nor in  
164 transcriptomic data of the European eel *Anguilla anguilla*. On the other hand, we did  
165 identify a *nos3* ortholog in the cloudy catshark *S. torazame*, suggesting its presence in the  
166 ancestor of gnathostomes. Previously, two *nos* genes had been found in the lamprey,  
167 called *nosA* and *nosB* [8], with unresolved orthology to gnathostome *nos1-nos2-nos3*, and  
168 derived from a lineage-specific tandem duplication in the lamprey lineage. Based on this  
169 finding, we searched for the presence of *nos* genes in other cyclostomes. In the genome of  
170 the arctic lamprey *Lethenteron camtschaticum* [25] we found orthologous genes to *P.*  
171 *marinus nosA* and *nosB* paralogs. On the other hand, in the inshore hagfish *Eptatretus*  
172 *burgeri* we identified a single *nos* gene. Our phylogenetic analysis shows that the hagfish  
173 *Nos* remains outside lamprey *NosA-NosB* clade, therefore with no clear orthology  
174 relationship to any specific gnathostome *Nos1*, *Nos2*, *Nos3*, and suggesting that the  
175 duplication giving rise to the lamprey *nosA-nosB* occurred at least before the last common  
176 ancestor of Petromyzontidae.

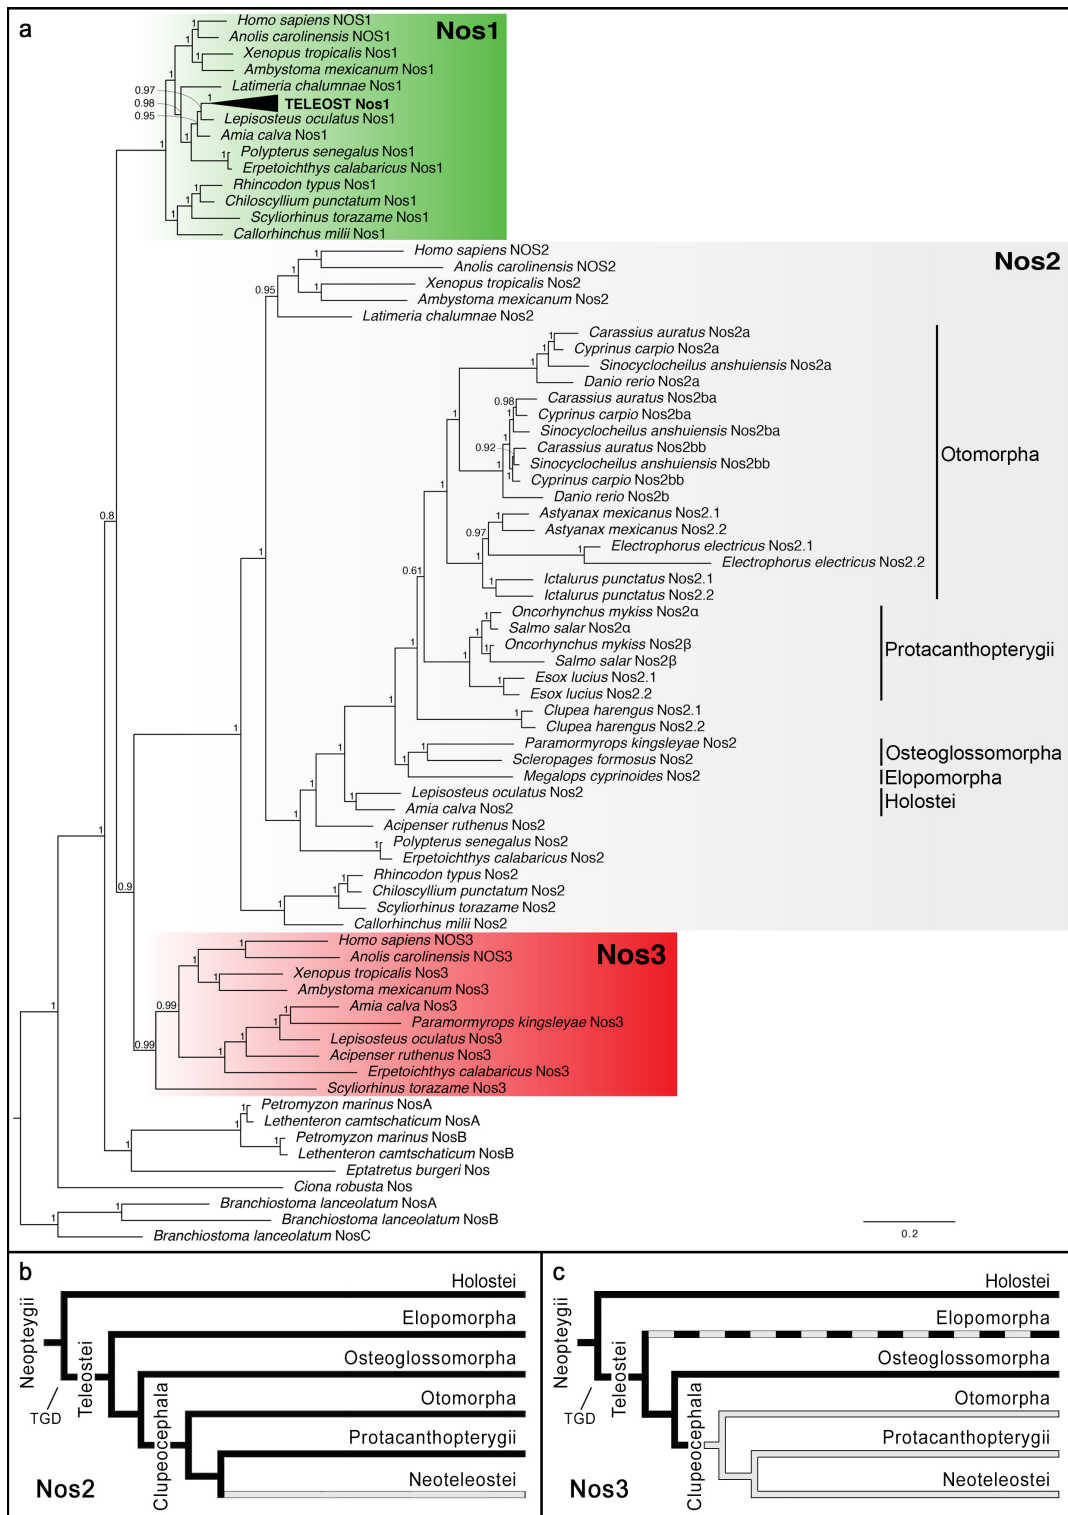

177

178 **Figure 1. Evolution of the Nos gene family. a**, Bayesian inference phylogenetic analysis  
 179 of Nos proteins in chordates. Nos1 clade is indicated by a green shading; light grey  
 180 shading for the Nos2 clade, and red shading for the Nos3 clade. Numbers at nodes  
 181 represent posterior probability values. Nos proteins from invertebrate chordates, the  
 182 lancelet *Branchiostoma lanceolatum*, and the tunicate *Ciona robusta*, were used as

183 outgroup sequences. **b-c**, Evolutionary scenarios indicating the loss of *Nos2* event in  
184 Neoteleostei (**b**) and *Nos3* in Clupeocephala (**c**) as grey lines. *Nos3* in Elopomorpha is  
185 absent although parsimony suggests it was present in stem elopomorphs, and it is  
186 indicated with a dashed line. The schematic representation of *Nos1* was omitted because  
187 it is present in single copy in all analysed gnathostome species. TGD stands for Teleost-  
188 specific Genome Duplication.

189

190

191 In order to better understand the gene loss and expansion events depicted by our  
192 phylogenetic analysis, we next analysed the microsynteny (genes linked in proximity) of  
193 *nos* genes in different species. This revealed a complex evolutionary scenario for *nos2*  
194 compared to *nos1* and *nos3*. Specific *nos2* duplications in different lineages are explained  
195 by distinct evolutionary events in teleosts (Fig. 2a and Supplementary Figure 1). First, the  
196 lack of synteny conservation between *nos2a* and *nos2b* in cyprinids, and the lack of *nos2a*  
197 in the expected location in non-cyprinid fishes (Supplementary Figure 1) indicates that  
198 these paralogs originated in a specific gene duplication event in a common ancestor of the  
199 lineage, independently from the TGD (the alternative explanation would require numerous  
200 *nos2a* losses in several fish lineages), in which while *nos2b* has remained the ancestral  
201 genomic location, *nos2a* has been translocated to a different position in the genome (Fig.  
202 2a and Supplementary Fig. 1). Second, an additional genome duplication event after the  
203 TGD specifically occurred independently in several teleost lineages, causing the presence  
204 of extra *nos2* paralogs. These include some cyprinids, in which a carp-specific genome  
205 duplication event (Cs4R) likely occurred before the divergence of *C. auratus*, *S.*  
206 *anshuiensis* and *C. carpio* [26], and salmonids (salmonid-specific genome duplication or  
207 Ss4R) [27,28], with *S. salar* and *O. mykiss* in this study. These additional tetraploidization  
208 events can explain the origin of the two independent sets of *nos2* genes in cyprinid and  
209 salmonid species. In the case of cyprinids, both our phylogenetic and synteny analyses

210 clearly show their *nos2b* orthology, and we denote them as *nos2ba* and *nos2bb* (Fig. 1a  
211 and Fig. 2a). In the case of salmonids, we name them *nos2 $\alpha$*  and *nos2 $\beta$*  to distinguish  
212 them from the cyprinid *nos2a* and *nos2b* paralogs, which have a separate origin (see  
213 above; Fig. 2a). Third, independent tandem gene duplications explain the presence of two  
214 *nos2* copies, that we named *nos2.1* and *nos2.2*, located next to each other in the same  
215 chromosomal fragment in the genomes of the Atlantic herring (*C. harengus*), the Mexican  
216 tetra (cavefish, *A. mexicanus*), the electric eel (*E. electricus*), the channel catfish (*I.*  
217 *punctatus*), and the northern pike (*E. lucius*) (Fig. 2a).

218 Bichir, reedfish, sterlet, spotted gar, bowfin and freshwater elephantfish are the only ray-  
219 finned fishes that retained a *nos3* ortholog. Therefore, we investigated the absence of  
220 *nos3* in clupecocephalans. First, we looked for the genomic region containing *nos3* in fishes  
221 that represent outgroups to the clupecocephalans. We found one long scaffold of the *P.*  
222 *kingsleyae* genome (scaffold 217) [24] showing extensive conserved synteny with the  
223 *nos3*-containing segment of the linkage group 11 (LG) in the spotted gar genome (Fig. 2b).  
224 While these appear to correspond to one of the TGD ohnologs (Fig. 2b), there are other  
225 two *P. kingsleyae* scaffold segments (from scaffolds 72 and 104) that together seem to  
226 represent the second TGD ohnolog, but lacking the expected *nos3* TGD ohnolog (Fig.  
227 2b). Zebrafish chromosomes 16 and 19 and medaka chromosomes 11 and 16 contain  
228 orthologous regions to the two *P. kingsleyae* and *L. oculatus* TGD ohnologs, but lack a  
229 *nos3* gene at the expected locations. One-to-one relationship between these *P. kingsleyae*  
230 scaffolds and zebrafish and medaka chromosomes is challenging to determine (Fig. 2b).  
231 Regardless, the most parsimonious explanation for the *nos3* repertoire in ray-finned fishes  
232 is that, first, one of the two *nos3* TGD ohnologs was lost in the teleost common ancestor,  
233 while the other was retained and later lost in secondary, independent events in the

234 common ancestor of Clupeocephala and, probably, that of Elopomorpha (Fig. 1c and Fig.  
 235 2b).

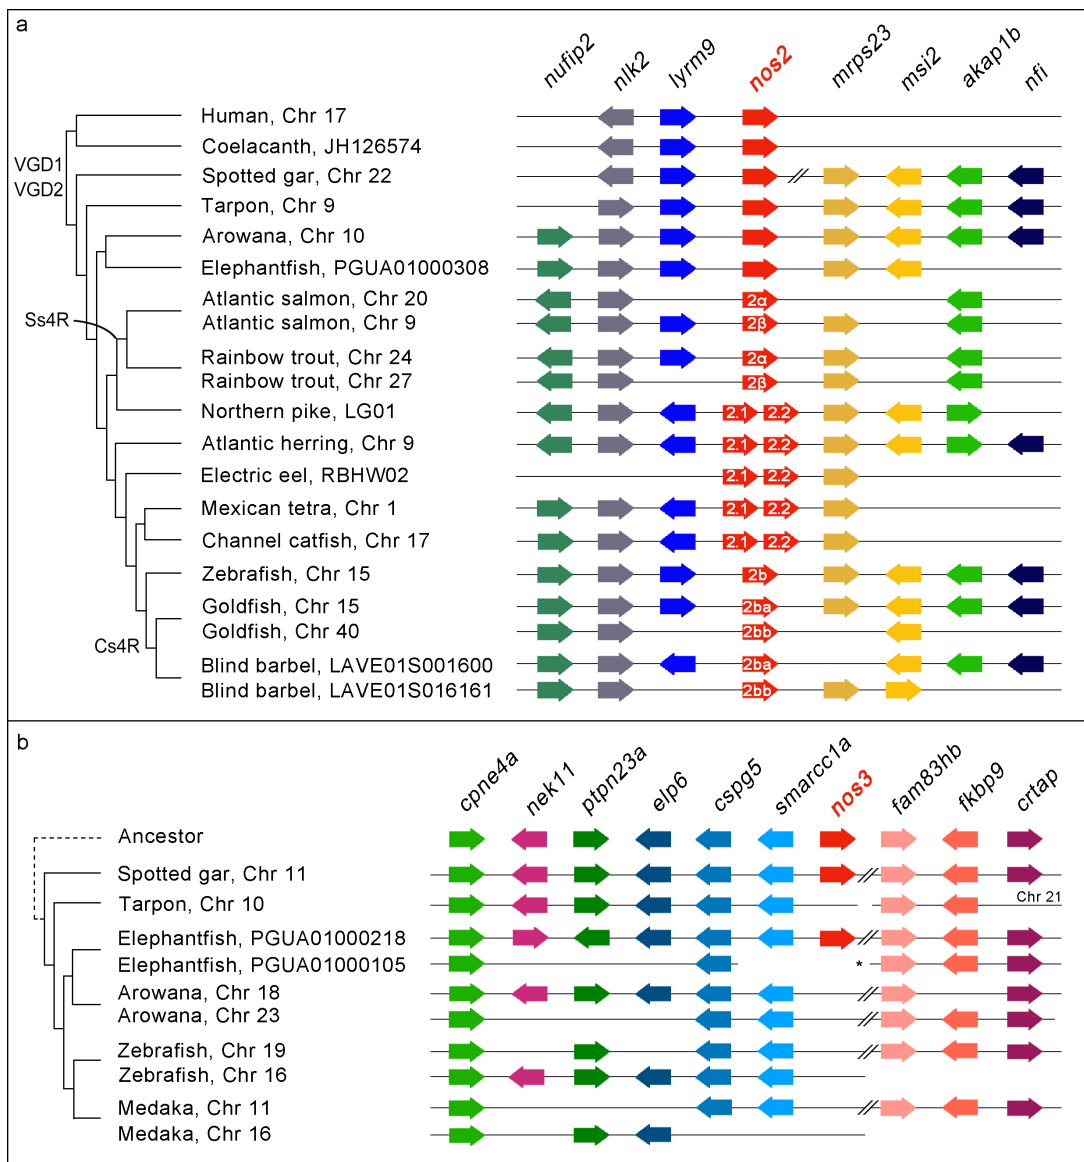

236  
 237 **Figure 2. Conserved microsynteny of *nos2* and *nos3*.** **a**, The *nos2* paralogs derived  
 238 from different duplication modalities: carp-specific genome duplication (Cs4R) (*nos2ba* and  
 239 *nos2bb* in the goldfish and blind golden-line barbel); salmonid-specific genome duplication  
 240 (Ss4R) (*nos2α* and *nos2β* in the Atlantic salmon and rainbow trout); tandem gene  
 241 duplication occurred independently in five lineages (*nos2.1* and *nos2.2* in the northern  
 242 pike, Atlantic herring, electric eel, Mexican tetra and channel catfish). An additional *nos2*  
 243 duplicate (*nos2a*) is present in cyprinids (zebrafish, goldfish, and blind barbel). **b**, A  
 244 conserved synteny map of genomic regions around the *nos3* gene locus highlights the loss  
 245 in Clupeocephala (including zebrafish and medaka), and in Osteoglossomorpha



246 (arowana). Genes are represented as arrows and are color coded according to their  
247 orthology and ohnology. The direction of arrows indicates transcription orientation. The  
248 symbol // indicates a long-distance on a chromosome. The asterisk indicates scaffold 72 of  
249 the freshwater elephantfish genome [24].

250

251

## 252 **Expression of *nos* in vertebrate developing gills**

253 Spotted gar is an important emerging model organism because it represents an  
254 evolutionary bridge between teleosts and tetrapods that facilitates cross-species  
255 comparisons. The gar genome is slowly evolving compared to that of teleosts and has  
256 preserved a more ancient structural organization [29]. Therefore, we examined the  
257 expression patterns of *nos* genes during gar development. As expected, based from the  
258 literature, *nos1* was expressed in several regions of the developing nervous system  
259 (Supplementary Fig. 2). In contrast, *nos2* expression was not detected during the  
260 developmental stages covered in the present study, i.e., from 4 to 14 days post fertilization  
261 (dpf). Unexpectedly, the expression of *nos3* was first detected in gar embryos in the  
262 pharyngeal area at 4 dpf (Fig. 3a-b) and increased at 6 dpf (Fig. 3c-d). At 7 dpf, embryos  
263 showed clear *nos3* expression in developing arches III, IV, and V (Fig. 3e-g). Later, at 11  
264 dpf, the positive signal is localized in gill filaments (Fig. 3i-k). Histological sections  
265 highlighted the presence of *nos3* in the epithelium of branchial lamellae (Fig. 3l), also  
266 confirmed by the signal in gill structures in an advanced stage of maturation in 14 dpf  
267 juveniles (Fig. 3m-p).

268



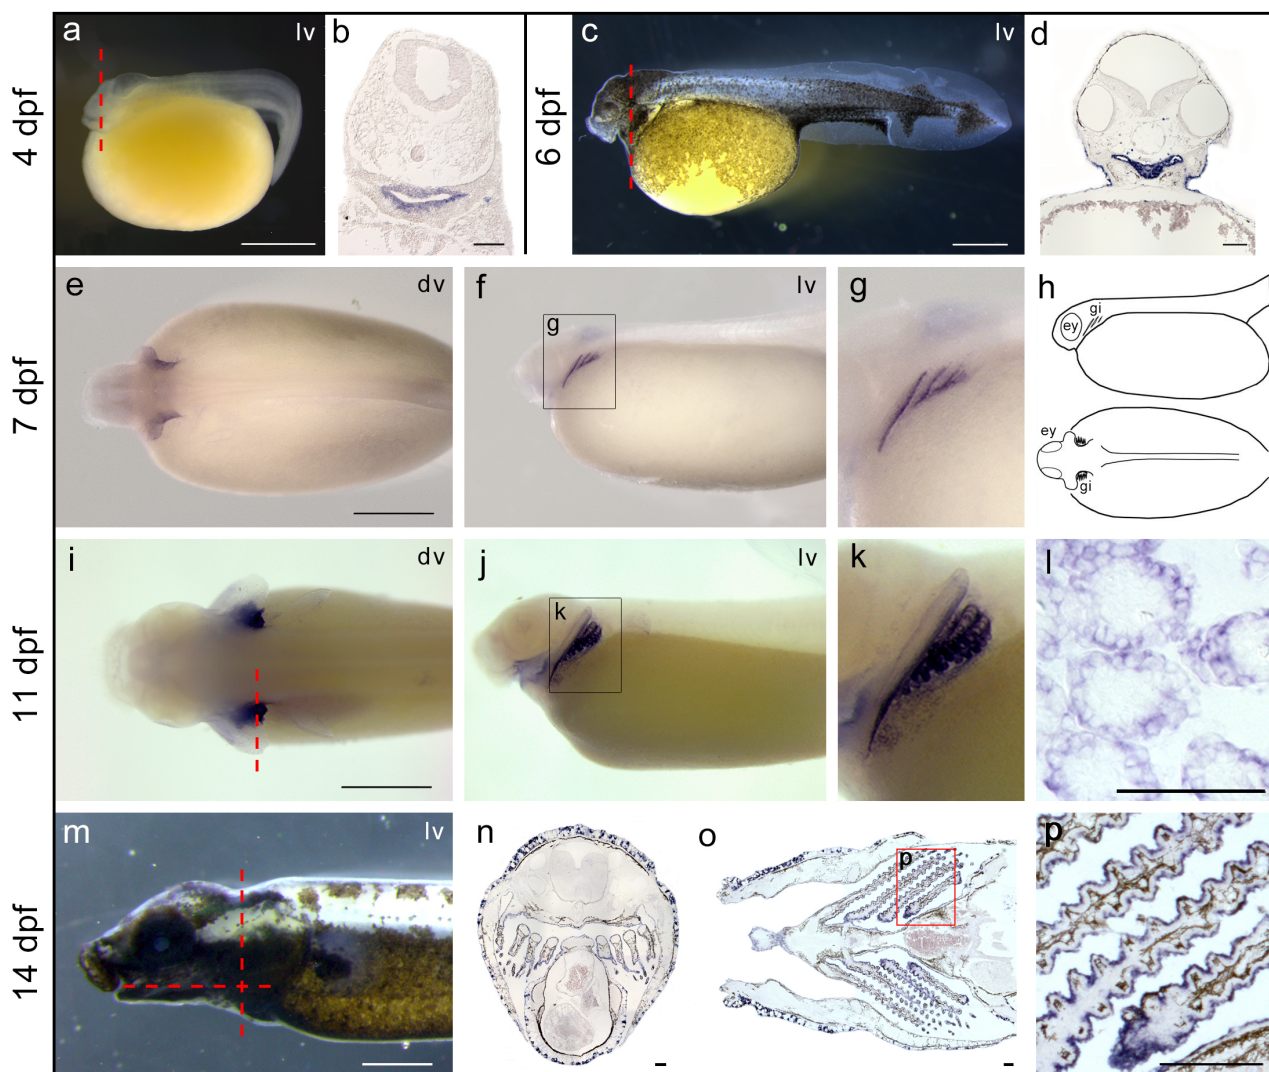

269

270 **Figure 3. Spotted gar *nos3* localization during development.** Expression of *nos3* is  
271 localized in the pharyngeal area in 4 dpf (a-b) and 6 dpf (c-d) embryos, in pharyngeal  
272 arches in 7 dpf larvae (e-g) schematized in (h), in developing gills in 11 dpf late larvae (i-l),  
273 and in gill lamellae in 14 dpf juveniles (m-p). Coronal (n) and transversal section (o)  
274 planes are indicated with a red dashed line in (m). Abbreviations: ey, eye; gi, gill; dv,  
275 dorsal view; lv, lateral view. Scale bar is 1 mm in a, c, e, i, m; 100  $\mu$ m in b, d, l, n, o, p.

276

277

278 The detection of *nos3* transcripts in gills of spotted gar and the established involvement of  
279 NO gas in osmoregulatory control and vascular motility in gills of numerous teleosts [30–  
280 35] prompted us to investigate whether a similar *nos* expression patterns occurred in  
281 developing gills of other fish species. We investigated *nos* expression in the sterlet

282 sturgeon *A. ruthenus* and the bichir *P. senegalus*, members of early-branching groups of  
283 ray-finned fishes [21]. Moreover, we similarly investigated *nos* expression in the  
284 chondrichthyan cloudy catshark *S. torazame* to infer the ancestral expression condition  
285 among gnathostomes. Unlike gar, we discovered that *nos3* was not expressed in gills of  
286 other species analysed in this work (Supplementary Fig. 2), thus raising questions about  
287 whether *nos3* expression in gills represents an oddity of holosteans or gars. Surprisingly,  
288 *nos1* and *nos2* were expressed in gills of sturgeon, bichir, and shark. In particular, *nos2*  
289 was expressed in the branchial area of the sterlet sturgeon (Fig. 4a-c) and bichir embryos  
290 (Fig. 4d-f), while *nos1* is expressed in gills of catshark embryos (Fig. 4g-i).  
291

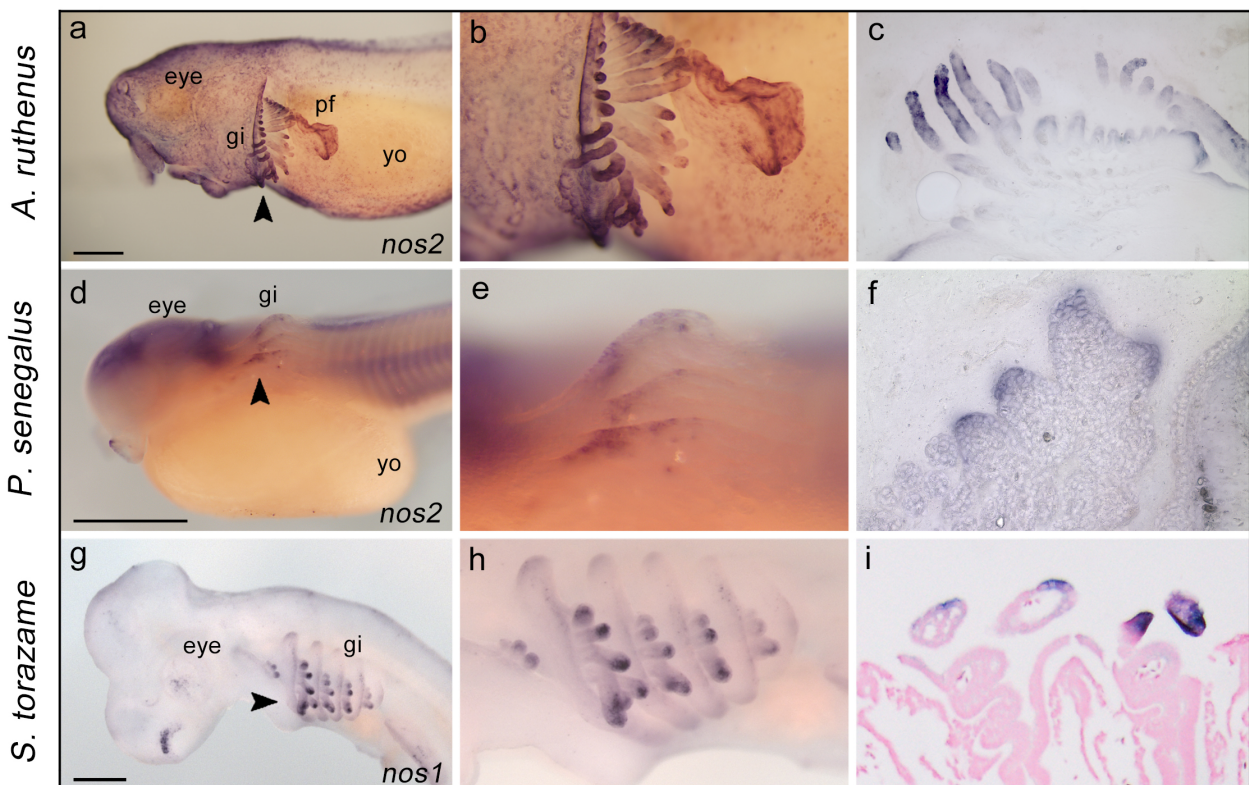

292  
293 **Figure 4. Expression of *nos* genes in developing gills of sterlet sturgeon, bichir, and**  
294 **shark embryos.** The expression of *nos2* in the gills of sterlet sturgeon *Acipenser ruthenus*  
295 (14 mm stage, **a-c**) and bichir *Polypterus senegalus* (stage 31, **d-e**); *nos1* in the shark  
296 *Scyliorhinus torazame* (stage 27, **g-i**). Higher magnification views of the gill structure of **a**,  
297 **d, g** are shown in **b, e, h**, respectively. The arrowheads indicate sectioning plane (**a, d, g**):

298 transversal sections (**c**, **f**, 50  $\mu$ m) and frontal section (**l**, 10  $\mu$ m). Abbreviations: gi, gill; yo,  
299 yolk; pf, pectoral fin. Scale bar in a, d, g is 0.5 mm.

300

301

302 Our results show that *nos* paralogs are expressed in pharyngeal arches and gills in both  
303 actinopterygians and chondrichthyans. These findings lead us to question whether *nos*  
304 expression in gills could be a conserved feature also in sarcopterygians, and in particular  
305 in amphibians that use gills for gas exchange. Therefore, to investigate the presence of  
306 *nos* transcripts in amphibia, we chose the neotenic axolotl *Ambystoma mexicanum*  
307 because it retains functional external gills throughout life. Gene expression analysis by  
308 qPCR revealed that *nos1* and *nos2* are almost not detectable in adult axolotl gills, while  
309 *nos3* turned out to be highly expressed in gill structures (Supplementary Fig. 3). Therefore,  
310 we conclude that *nos* expression in gills is a conserved feature in neotenic amphibian  
311 assayed, previously observed exclusively in fishes.

312

### 313 **Expression of *nos* genes in the lamprey**

314 In cyclostomes (jawless vertebrates, including lampreys and hagfish), cartilaginous and  
315 bony gnathostomes (jawed vertebrates), gills are endoderm-derived structures, pointing to  
316 a single origin of pharyngeal gills before the divergence of these vertebrate lineages  
317 [36,37]. The two lamprey *nos* paralogs, *nosA*, and *nosB*, display an unresolved orthology  
318 relationship with their gnathostomes *nos1*, *nos2*, and *nos3* (Fig. 1). To assess whether  
319 *nosA* and *nosB* are expressed in gills during embryogenesis, we performed whole-mount  
320 *in situ* hybridization experiments at different embryonic stages. We found that lamprey  
321 *nosA* was expressed in several tissues, including the brain, dorsal midline epidermis,  
322 tailbud, mouth, and cloaca, but not in gills (Fig. 5a-b). Conversely, the lamprey *nosB*  
323 paralog showed restricted expression in the developing mouth, specifically in the cheek



324 process, including upper and lower lip regions (Fig. 5c-d). These results show that in the  
325 arctic lamprey, neither of the two *nos* paralogs is expressed in immature or mature gills,  
326 suggesting a fundamental difference in the role of *nos* genes in jawless and jawed  
327 vertebrates.  
328

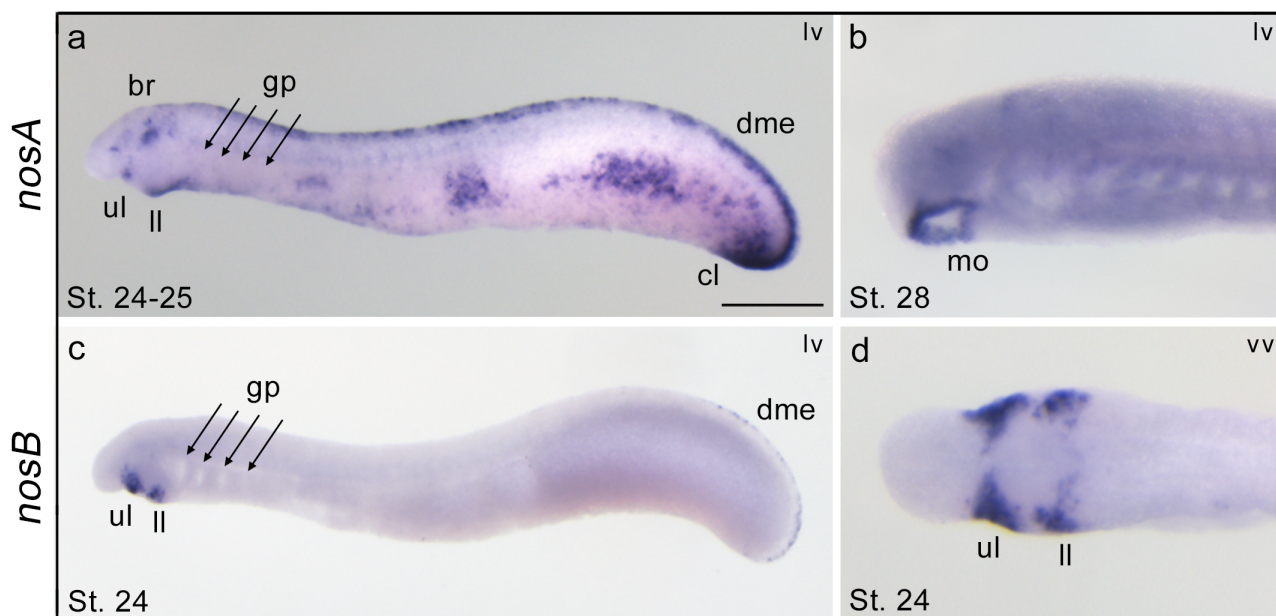

329  
330 **Figure 5. Expression patterns of *nosA* and *nosB* in larvae of the arctic lamprey.** At  
331 stage 24-25 the *nosA* is expressed in the brain, mouth, upper and lower lip, dorsal midline  
332 epidermis, and cloaca (**a**). At stage 28, *nosA* expression is restricted to the mouth (**b**). The  
333 *nosB* is exclusively expressed in the cheek process, consisting of upper and lower lips (**c**-  
334 **d**), and faint expression in the dorsal midline epidermis (**c**). Abbreviations: br, brain; cl,  
335 cloaca; dme, dorsal midline epidermis; gp, gill pouches; mo, mouth; ll, lower lip; ul, upper  
336 lip; lv, lateral view; vv, ventral view. Scale bar in a is 0.5 mm.

337

338

## 339 Discussion

340 Actinopterygian fishes experienced one of the largest radiations in the animal kingdom and  
341 their history represents a valuable resource for the formulation of hypotheses regarding  
342 the evolution of vertebrate gene families. In this work, we employed data from recent

343 genome projects to clarify and update the evolution of Nos family across vertebrates. We  
344 performed a phylogenetic reconstruction using Nos protein sequences from key vertebrate  
345 groups, including cyclostomes for which little information has previously been available.  
346 Our phylogenetic analysis confirmed that Nos1 is ubiquitously present as single copy gene  
347 across the gnathostome lineage, at least in the covered osteichthyan and chondrichthyan  
348 species. Branch lengths of the Nos1 clade suggest a slow evolutionary rate throughout  
349 vertebrate evolution in respect to the other two *nos* genes. Furthermore, our phylogenetic  
350 data, complemented with syntenic analyses, highlighted for the first time a highly complex  
351 scenario of Nos2 evolution, for which we suggest a nomenclature that attempts to  
352 incorporate evolutionary origins into gene names. Previous analyses showed the presence  
353 of two *nos2* genes (*nos2a* and *nos2b*) in zebrafish and goldfish [38,39]. Here we show the  
354 presence of a *nos2a* paralog also in other two cyprinids, *C. carpio* and *S. anshuiensis* (Fig.  
355 1a and Fig. 2a). *nos2a* and *nos2b* likely derive from an event of gene duplication that  
356 occurred specifically at the stem of the group, and not related to the classic TGD. This  
357 result is supported by synteny analysis since the chromosomal position of *nos2a* and  
358 *nos2b* genes is not conserved (Fig. 2a and Supplementary Fig. 1), as it would be expected  
359 if they were retained after a whole-genome duplication. On the other hand, the cyprinid  
360 *nos2b* paralog independently duplicated in carps after the Cs4R [26], as the conserved  
361 synteny suggests (Fig. 2a). In salmonids, synteny analysis also implies that the two Nos2  
362 paralogs originated secondarily after the Ss4R (Fig. 2a) [27,28]. Here, we call these genes  
363 *nos2ba* and *nos2bb* in carps to emphasize and clarify their relationships to zebrafish  
364 genes, and *nos2 $\alpha$*  and *nos2 $\beta$*  in salmonids to indicate their distinct evolutionary origin.  
365 Additionally, the present work shows that *nos2* has undergone several independent  
366 lineage-specific tandem gene duplication events (*nos2.1* and *nos2.2*) (Fig. 2a). The search  
367 of *nos2* in available fish genomes, covering all main groups, failed to find it in any

368 Neoteleostei, and for this reason, we hypothesized a *nos2* gene loss event occurred in  
369 stem Neoteleostei (Fig. 1 and Fig. 6). It is worth mentioning that NO produced upon  
370 stimulation of the inducible *nos* (*nos2*) is considered one of the most versatile players of  
371 the immune system against infectious diseases, autoimmune processes and chronic  
372 degenerative diseases [4,40]. For this reason, it would be important in the future to  
373 investigate the impact of *Nos2* loss on the immune response in Neoteleostei and if any  
374 compensatory mechanisms occurred through the activation of other *nos* paralogs. In  
375 addition, *Nos2* is the only *nos* gene with retained duplicates in vertebrates, therefore, it  
376 would also be important to understand if *nos2* duplicates underwent neofunctionalization  
377 or subfunctionalization, thus providing new functional features to the organism.

378 Concerning *nos3*, our understanding of its evolutionary history had a twist with the finding  
379 of a *nos3* ortholog in the spotted gar genome [20], proving that the previously postulated  
380 actinopterygian-specific loss of *nos3* was an incorrect inference. Fostered by this  
381 discovery, we specifically searched for the presence of *nos3* orthologs in a wide range of  
382 fish species to infer the ancestral condition. We identified a *nos3* gene in bowfin, thus  
383 confirming the presence of *nos3* in the other reference genus of the holostean clade, in  
384 addition to gar (Fig. 1a and Fig. 6). Furthermore, the presence of *nos3* in genomes of  
385 bichir and sterlet sturgeon, which diverged prior to the teleostean and holostean split,  
386 confirmed the hypothesis that *nos3* was already present in the common ancestor of extant  
387 osteichthyans, rather than an innovation of tetrapods [8] or neopterygians (holosteans plus  
388 teleosts) [20] (Fig. 6). We did not find *nos3* gene in the tarpon *M. cyprinoides* genome (Fig.  
389 2b), and to date, the limited genomic and transcriptomic data of eels, congers, and morays  
390 cannot endorse the presence of a *nos3* in Elopomorpha. Therefore, more genome  
391 sequences are necessary to confirm its absence in this key group. We also did not find  
392 *nos3* in any fish from Clupeocephala (non-elopomorph and non-osteoglossomorph

393 teleosts; Fig. 1a and Fig. 2b) suggesting that a loss event took place in the common  
394 ancestor of clupecocephalans (Fig. 1c and Fig. 2b). Notably, we found a *nos3* gene in the  
395 osteoglossomorph elephantfish *P. kingsleyae* (Fig. 1a and Fig. 2b), and it allowed us to  
396 confirm that the loss of *nos3* did not occur in the last common teleost ancestor, as  
397 previously thought [20]. These findings suggest instead the following evolutionary scenario  
398 for the *nos3* gene: first, since we only find a maximum of one *nos3* gene in those cases  
399 where it is present, we assume that one of the two TGD ohnologs was immediately lost  
400 after the TGD, and the other one was retained. This *nos3* gene was then lost in the  
401 ancestors of elopomorphs –although further research is needed to confirm this– and  
402 clupecocephalans independently in separate events (Fig. 6).

403 The discovery of *nos3* in sharks (*S. torazame* in this study) suggests that the origin of *nos3*  
404 predates the divergence of gnathostomes and that three distinct *nos* paralogs were  
405 already present in the last common ancestor of gnathostomes (Fig. 6), likely originating  
406 after the two rounds of whole-genome duplication that took place during early vertebrate  
407 evolution (VGD1 and VGD2, 2R hypothesis) [41]. The origin of *nos* genes is, in fact,  
408 supported by the linkage to the evolutionarily conserved *Hox* gene clusters and several  
409 other syntenic genes (Fig. 6b and Supplementary Fig. 4). Under this scenario, then a  
410 fourth *nos* gene (putative *nos4*) should have existed but was apparently lost early in the  
411 gnathostome evolution (Fig. 6a).

412 The apparent lack of *nos* genes in some vertebrate lineages remains to be clarified, such  
413 as the absence of *nos3* in coelacanth *L. chalumnae* (an extant basally diverging  
414 sarcopterygian), in arowana *S. formosus* (an osteoglossomorph), and in elopomorph  
415 fishes. In the future, further genomic projects will surely fill these gaps in our  
416 understanding of this fascinating gene family.

417

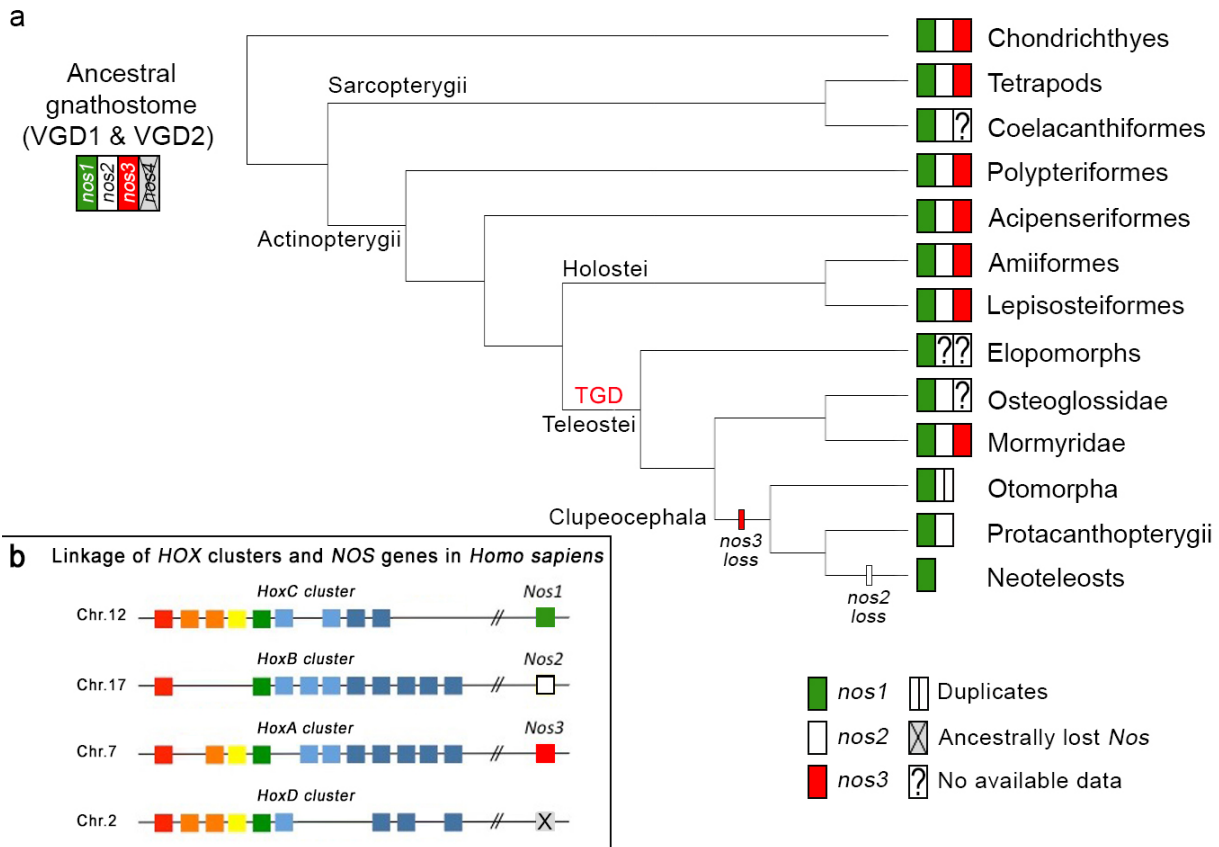

418

419 **Figure 6. *Nos* evolution in light of recent gene findings in vertebrates.** The proposed  
 420 evolution of *nos* genes in gnathostomes (**a**) supposes an ancestral loss of a predicted  
 421 fourth *nos* gene (grey box), based on the linkage of human *nos* and *Hox* clusters (**b**). Loss  
 422 of *nos3* occurred in stem Clupeocephala and loss of *nos2* in stem Neoteleostei (**a**).  
 423 Species-specific *nos2* duplications occurred in some Otomorpha, including Cyprinidae and  
 424 Characidae families.

425

426

427 The importance of NO in the ontogeny and function of vertebrate gills has already been  
 428 documented in the context of physio-pharmacological studies, primarily using inhibitors of  
 429 Nos activity. In gills, NO acts as a paracrine and endocrine vasoactive modulator and,  
 430 therefore, plays a crucial role in the distribution of oxygenated blood [42]. Moreover, NO  
 431 has an osmoregulatory function controlling the movement of ions across the gill epithelium  
 432 [33,43–45], and represents an important molecular component of the immune system  
 433 employed by macrophages to attack and destroy pathogens [46]. Nevertheless,



434 documentation of Nos enzymatic activity in fish gills has relied exclusively upon techniques  
435 unable to discriminate among individual Nos proteins, such as NADPH-diaphorase activity  
436 and immunolocalization with heterologous mammalian antibodies [42,44,45,47]. Therefore,  
437 the detected enzymatic activity has for a long time been indicated generically as 'Nos-like'.  
438 Here we used a different approach based on mRNA transcript detection methodology,  
439 which unequivocally distinguishes different genes, and showed, for the first time, that  
440 indeed *nos* genes are expressed in gills during development in various vertebrates.  
441 However, surprisingly different Nos paralogs are expressed in gills in different animals  
442 tested: *nos1* in shark, *nos2* in bichir and sterlet sturgeon, and *nos3* in spotted gar. The  
443 most parsimonious hypothesis to explain this result is that the ancestral *nos* gene had a  
444 number of roles in gills, immune system, brain, and other organs that was controlled by  
445 separate regulatory elements and, due to subfunctionalization after the vertebrate 2R  
446 (according to the Duplication-Degeneration-Complementation (DDC) model) [48], these  
447 physiological roles partitioned to different *nos* ohnologs as lineages diverged and  
448 reciprocal loss of the gill expression function occurred in a lineage-specific way. Further  
449 support to this hypothesis comes from the identification of *nos1*-positive cells in gill of  
450 zebrafish at 5 dpf, in addition to brain, eye, periderm and NaK ionocytes, according to the  
451 recently released developmental single-cell transcriptome atlas [49] (Supplementary Fig.  
452 5).

453 Additionally, to corroborate the involvement of NO in normal gill physiology, we searched  
454 for *nos* expression in gills of a paedomorphic amphibian, the Mexican axolotl, which  
455 maintains gill structures in adulthood. Taking into account the different evolutionary and  
456 developmental origin of internal and external gills [50], the conservation of *nos3*  
457 expression in gills indicated that the NO signaling system could be indeed fundamental for  
458 the physiology and development of this structure in the axolotl, and perhaps generally in

459 pre-metamorphic amphibians. Therefore, our data obtained from established and  
460 emerging model species highlighted that the expression of at least one *nos* gene has a  
461 functional role in gnathostome gills.

462 Recently, a single origin of pharyngeal gills predating the divergence of cyclostomes and  
463 gnathostomes was suggested [36]. Therefore, we investigated whether either of the two  
464 arctic lamprey *nos* paralogs is expressed in developing gills, but found them expressed  
465 mainly in the nervous system, mouth and pharynx, similarly to the expression pattern  
466 previously reported in the cephalochordate amphioxus [51,52]. Nevertheless, we found  
467 neither of the two genes to be expressed in gills during lamprey development, leading us  
468 to speculate that either the expression of *nos* genes in gills was acquired in gnathostomes  
469 after the divergence from cyclostomes, or alternatively, gill expression was a feature of  
470 their last common ancestor but lost in the lamprey lineage. Future work on hagfish  
471 embryology would be necessary to help solve this issue.

472 In conclusion, our findings pave the way for future studies that aim to investigate the  
473 ontogenetic role of nitric oxide in gill development of aquatic vertebrates, possibly by loss-  
474 of-function approaches using either *Nos* protein-specific chemical inhibitors or CRISPR-  
475 Cas9 gene editing. From the perspective of the evolution of developmental mechanisms, it  
476 would be interesting to understand more about the species-specific regulatory  
477 mechanisms that drive different *nos* genes expression patterns in gills in different species

478

479

## 480 **Materials and Methods**

### 481 **Sequence mining and phylogenetic analysis**

482 *Nos* sequences used for evolutionary analyses were retrieved from NCBI  
483 (<https://www.ncbi.nlm.nih.gov/>), Ensembl ([www.ensembl.org/index.html](http://www.ensembl.org/index.html)), Skatebase

484 (<http://skatebase.org/>) and DDBJ (<https://www.ddbj.nig.ac.jp/index-e.html>) databases,  
485 using direct browser webpages or by downloading fully assembled genomes and  
486 transcriptomes (see Supplementary Table 1 for accession numbers). The quality of protein  
487 sequences was checked and, where needed, manually curated excluding from the dataset  
488 partial or low blast score sequences. We used proteins from *Homo sapiens*, *Anolis*  
489 *carolinensis* and *Xenopus tropicalis* as internal references, and two non-vertebrate  
490 chordates as outgroups: the cephalochordate *Branchiostoma lanceolatum* NosA, NosB  
491 and NosC, and the tunicate *Ciona robusta* Nos.

492 Nos sequences from bowfin (*A. calva*) were obtained from a draft genome assembly [23].  
493 Lamprey *nosA* and *nosB* genes were obtained by TBLASTN v2.2.31+ searches [53] from  
494 the v1.0 draft genome of arctic lamprey *L. camtschaticum* [25] and the germ line draft  
495 genome of sea lamprey *P. marinus* [54]. Initial predictions were extended, corrected, and  
496 confirmed by RACE PCRs in the case of *L. camtschaticum*. Both *P. marinus nosA* and  
497 *nosB* were manually curated using Wise2 [55]. The single *nos* gene sequence from the  
498 inshore hagfish *E. burgeri* was obtained from a *de novo* transcriptome assembly [56].  
499 Sequences of *nos1*, *nos2*, and *nos3* genes from the cloudy catshark *S. torazame* were  
500 obtained from a *de novo* transcriptome assembly [56] employing TBLASTN v2.2.31+. A  
501 partial *nos1* sequence (g15096.t1) was found in the European eel *A. anguilla*  
502 transcriptome database (EeelBase 2.0, <http://compgen.bio.unipd.it/eeelbase/>), but it was  
503 deliberately excluded from the phylogenetic analyses because of alignment ambiguities,  
504 probably due to gene assembly errors.

505 For phylogenetic analysis, Nos amino acid sequences were aligned using the MUSCLE  
506 algorithm [57] as implemented in MEGAX (version 10.2.4) [58], with default parameters,  
507 run in a MacOS 11.2.1 operating system and saved in FASTA format. The alignment was  
508 trimmed by trimAl v1.2rev59 [59], using the ‘-automated1’ parameter. The trimmed

509 alignment was then formatted into a nexus file using readAl (bundled with the trimAl  
510 package) (supplementary file S1). A Bayesian inference tree was constructed using  
511 MrBayes v3.2.6 [60], under the assumption of an LG+I+G evolutionary model. Two  
512 independent MrBayes runs of 2,000,000 generations were performed, with four chains  
513 each and a temperature parameter value of 0.05. The tree was considered to have  
514 reached convergence when the standard deviation stabilized under a value of <0.01. A  
515 burn-in of 25% of the trees was performed to generate the consensus tree (1,500,000  
516 post-burnt-in trees).

517

## 518 **Synteny**

519 Conserved synteny analyses were manually performed on fish chromosomes or scaffolds.  
520 With the aim of finding synteny blocks flanking the *nos2* and *nos3* orthologs, we employed  
521 the Synteny Database ([http://syntenydb.uoregon.edu/synteny\\_db/](http://syntenydb.uoregon.edu/synteny_db/)) [61,62]. Additional  
522 information was retrieved in NCBI (<https://www.ncbi.nlm.nih.gov/>), Ensemble v.102  
523 (<http://www.ensembl.org/index.html>) and Genomicus v100.01  
524 (<https://www.genomicus.biologie.ens.fr/genomicus-100.01/cgi-bin/search.pl>) [61].

525

## 526 **Collection of embryos and tissues**

527 Spotted gar *L. oculatus* adult specimens were collected from the Atchafalaya River basin,  
528 Louisiana (USA) and cultured in a 2 m diameter tank containing artificial spawning  
529 substrate. Spawning was induced by injection of Ovaprim© (0.5 ml/kg) and embryos were  
530 raised in fish water (salinity 1 ppt) at 24°C in a 14/10 h light/dark cycle [63]. The  
531 developmental staging was determined following hours or days post fertilization in addition  
532 to morphological criteria [64].

533 Embryos of *L. camtschaticum* were obtained by artificial fertilization, cultured at a  
534 temperature ranging between 9 and 12°C, and staged as previously described [65,66].  
535 Embryos of *S. torazame* were obtained, cultured, and staged as previously described  
536 [67,68].  
537 Bichir *P. senegalus* embryos were obtained from the breeding colony at the Department of  
538 Zoology, Charles University, Prague (Czech Republic) by natural breeding. Embryos were  
539 kept at 28°C and staged using Diedhiou and Bartsch (2009) guidelines [69]. Sterlet  
540 sturgeon *A. ruthenus* embryos were obtained from the hatcheries of the Research Institute  
541 of Fish Culture and Hydrobiology in Vodnany, University of South Bohemia (Czech  
542 Republic). Embryos were raised in tanks containing E2 Pen/Strep zebrafish medium and  
543 incubated at 17°C until the desired stages, according to Dettlaff and collaborators (1993)  
544 [70]. Gill tissues from two adult axolotls (RRID:AGSC\_110A) were collected under  
545 benzocaine anesthesia (University of Kentucky, USA, IACUC protocol 2017-2580).

546

#### 547 **Gene expression analysis by *in situ* hybridization**

548 For all species used in the present study, total RNA was isolated from a mix of embryo  
549 stages using the phenol-chloroform method with TRIzol (Thermo-Fisher Scientific). cDNA  
550 was synthesized from 1 µg of total RNA using the SuperScript VILO cDNA Synthesis kit  
551 (Thermo-Fisher Scientific). Primers for PCR amplification are listed in Supplementary  
552 Table 2. Amplicons were cloned into the pGEM-T Easy Vector (Promega) and Sanger  
553 sequenced. Antisense Digoxigenin-UTP riboprobes were synthesized using SP6 or T7  
554 RNA polymerases and the DIG RNA Labeling kit (Roche).

555 Whole-mount *in situ* hybridization experiments were performed following protocols  
556 previously described: spotted gar [71], bichir and sturgeon [72], lamprey [65], and shark  
557 [73], with slight modifications. For spotted gar embryos at 7 dpf (Long & Ballard stage 24)

558 and 11 dpf (Long & Ballard stage 28), longer proteinase K (10 µg/mL) digestion times were  
559 performed, respectively 25 and 35 minutes at 24°C. Moreover, endogenous melanin  
560 pigment was removed using bleaching solution [(3% hydrogen peroxide (H<sub>2</sub>O<sub>2</sub>) and 1%  
561 potassium hydroxide (KOH) in distillate water (ddH<sub>2</sub>O)] for a few minutes. For 14 dpf gar  
562 embryos (Long & Ballard stage 31), we performed *in situ* hybridizations on cryosections,  
563 as previously described [74], including modifications reported in [75].

564 Transversal vibratome sections of bichir and sturgeon embryos (thickness 50 µm) were  
565 made on whole-mount hybridized embryos upon embedding in  
566 gelatin/albumin/glutaraldehyde [50]. Shark embryos were embedded in paraffin after  
567 whole-mount *in situ* hybridization assays, and frontal sections (10 µm) were obtained with  
568 a microtome.

569 Whole-mount and sectioned preparations mounted on slides were imaged on Axio Imager  
570 Z2 with Apotome 2 (Carl Zeiss), equipped with AxioCam 503 color digital camera and  
571 Axio Vision software for analysis. Whole-mount bichir and sturgeon embryos were  
572 photographed as Z-stacks using a motorized dissection microscope (Olympus SZX12) and  
573 deep-focus images were generated by merging Z-stacks in QuickPhoto Micro.

574

### 575 **Real-time PCR**

576 Expression levels of *nos* genes in axolotl *A. mexicanum* gills were analysed by qPCR  
577 using specific primers reported in Supplementary Table 2. The *atpf51* gene was used as a  
578 reference. RNA was isolated by performing a chloroform extraction and isopropanol  
579 precipitation. RNA was quantified using a Nanodrop and 1 µg of total RNA was used to  
580 generate cDNA using an Invitrogen Super-Script IV cDNA synthesis kit with oligo-dT  
581 tailing. RT-qPCR was performed in triplicate with SYBER Master Mix on a LightCycler 96

582 (Bio-Rad), using a 2-step amputation protocol (95°C for 10 sec, 60°C for 30 sec) and 40  
583 cycles. Data were analysed using the  $\Delta\Delta\text{CT}$  method.

584

#### 585 **Data availability**

586 Accession numbers of protein sequences used in the phylogenetic analysis are available  
587 in Supplementary Table 1. Primer sequences used for the synthesis of *in situ* hybridization  
588 riboprobes and in quantitative real-time PCR experiments are given in Supplementary  
589 Table 2.

590

#### 591 **Acknowledgments**

592 The authors thank Allyse Ferrara and Quenton Fontenot, Louisiana State University  
593 (USA), for their help in the generation of spotted gar embryos. The authors thank Fumiaki  
594 Sugahara for his help in the interpretation of results in the arctic lamprey, Anna Pospisilova  
595 for technical assistance with bichir and sturgeon *in situ* hybridizations, and Martin  
596 Psenicka, Roman Franek, Michaela Fucikova, Marek Rodina, David Gela, and Martin  
597 Kahanec for sterlet sturgeon spawns. A special thanks to Robert Cerny for the  
598 establishment of the African bichirs colony at the Charles University in Prague.

599 Giovanni Annona was supported by the Research grant POR Campania FSE 2014/2020  
600 (IT) and by the EMBO Short Term Fellowship (# 6936) to visit the Postlethwait laboratory  
601 in Oregon (USA) and for the field trip in Louisiana (USA). Jan Stundl is supported by the  
602 European Union's Horizon 2020 research and innovation program under the Marie  
603 Skłodowska-Curie grant agreement No. 897949. Vladimir Soukup is supported by the  
604 Charles University Research Centre program No. 204069 and grant SVV260571/2020.  
605 Randal Voss and the Ambystoma Genetic Stock Center are supported by the National  
606 Institutes of Health, USA (P40OD019794). John H. Postlethwait is supported by the R01

607 OD011116 grant from the US National Institutes of Health. Salvatore D’Aniello is  
608 supported by the NOEVO grant from the Stazione Zoologica Anton Dohrn Napoli.

609

## 610 **Competing interests**

611 The authors declare no competing interests.

612

## 613 **References**

614 1. Koshland D. The molecule of the year. *Science* (80). 1992;258: 1861–1861.

615 2. Strijdom H, Chamane N, Lochner A. Nitric oxide in the cardiovascular system: a  
616 simple molecule with complex actions. *Cardiovasc J Afr.* 2009;20: 303–10.

617 3. Esplugues J V. NO as a signalling molecule in the nervous system. *Br J Pharmacol.*  
618 2002;135: 1079–1095.

619 4. Bogdan C. Nitric oxide and the immune response. *Nat Immunol.* 2001;2: 907–916.

620 5. Knott AB, Bossy-Wetzel E. Nitric Oxide in Health and Disease of the Nervous  
621 System. *Antioxid Redox Signal.* 2009;11: 541–553.

622 6. Kamm A, Przychodzen P, Kuban-Jankowska A, Jacewicz D, Dabrowska AM,  
623 Nussberger S, et al. Nitric oxide and its derivatives in the cancer battlefield. *Nitric*  
624 *Oxide.* 2019;93: 102–114.

625 7. Santolini J. What does “NO-Synthase” stand for? *Front Biosci.* 2019;24:  
626 133–171.

627 8. Andreakis N, D’Aniello S, Albalat R, Patti FP, Garcia-Fernandez J, Procaccini G, et  
628 al. Evolution of the Nitric Oxide Synthase Family in Metazoans. *Mol Biol Evol.*  
629 2011;28: 163–179.

630 9. Berg DA, Belnoue L, Song H, Simon A. Neurotransmitter-mediated control of  
631 neurogenesis in the adult vertebrate brain. *Development.* 2013;140: 2548–2561.



- 632 10. Steinert JR, Chernova T, Forsythe ID. Nitric Oxide Signaling in Brain Function,  
633 Dysfunction, and Dementia. *Neurosci.* 2010;16: 435–452.
- 634 11. Moncada S, Higgs EA. The discovery of nitric oxide and its role in vascular biology.  
635 *Br J Pharmacol.* 2006;147: S193–S201.
- 636 12. Namba T, Koike H, Murakami K, Aoki M, Makino H, Hashiya N, et al. Angiogenesis  
637 Induced by Endothelial Nitric Oxide Synthase Gene Through Vascular Endothelial  
638 Growth Factor Expression in a Rat Hindlimb Ischemia Model. *Circulation.* 2003;108:  
639 2250–2257.
- 640 13. Förstermann U, Sessa WC. Nitric oxide synthases: regulation and function. *Eur*  
641 *Heart J.* 2012;33: 829–837.
- 642 14. Postlethwait J, Amores A, Force A, Yan YL. The zebrafish genome. *Methods Cell*  
643 *Biol.* 1998;60: 149–163.
- 644 15. Amores A. Zebrafish hox Clusters and Vertebrate Genome Evolution. *Science* (80- ).  
645 1998;282: 1711–1714.
- 646 16. Taylor JS, Van de Peer Y, Braasch I, Meyer A. Comparative genomics provides  
647 evidence for an ancient genome duplication event in fish. Schilling T, Wilson S,  
648 editors. *Philos Trans R Soc London Ser B Biol Sci.* 2001;356: 1661–1679.
- 649 17. Jaillon O, Aury J-M, Brunet F, Petit J-L, Stange-Thomann N, Mauceli E, et al.  
650 Genome duplication in the teleost fish *Tetraodon nigroviridis* reveals the early  
651 vertebrate proto-karyotype. *Nature.* 2004;431: 946–957.
- 652 18. Tota B, Amelio D, Pellegrino D, Ip YK, Cerra MC. NO modulation of myocardial  
653 performance in fish hearts. *Comp Biochem Physiol Part A Mol Integr Physiol.*  
654 2005;142: 164–177.
- 655 19. Agnisola C, Pellegrino D. Role of nitric oxide in vascular regulation in fish. *Advances*  
656 *in Experimental Biology.* 2007. pp. 293–310.

- 657 20. Donald JA, Forgan LG, Cameron MS. The evolution of nitric oxide signalling in  
658 vertebrate blood vessels. *J Comp Physiol B*. 2015;185: 153–171.
- 659 21. Hughes LC, Ortí G, Huang Y, Sun Y, Baldwin CC, Thompson AW, et al.  
660 Comprehensive phylogeny of ray-finned fishes (Actinopterygii) based on  
661 transcriptomic and genomic data. *Proc Natl Acad Sci*. 2018;115: 6249–6254.
- 662 22. Du K, Stöck M, Kneitz S, Klopp C, Woltering JM, Adolfi MC, et al. The sterlet  
663 sturgeon genome sequence and the mechanisms of segmental rediploidization. *Nat*  
664 *Ecol Evol*. 2020;4: 841–852.
- 665 23. Thompson A, Hawkins M, Parey E, Wcisel D, Ota T, Kawasaki K, et al. The genome  
666 of the bowfin (*Amia calva*) illuminates the developmental evolution of ray-finned  
667 fishes. *Nat Res*. 2020.
- 668 24. Gallant JR, Losilla M, Tomlinson C, Warren WC. The genome and adult somatic  
669 transcriptome of the mormyrid electric fish *paramormyrops kingsleyae*. *Genome Biol*  
670 *Evol*. 2017;9: 3525–3530.
- 671 25. Mehta TK, Ravi V, Yamasaki S, Lee AP, Lian MM, Tay B-H, et al. Evidence for at  
672 least six Hox clusters in the Japanese lamprey (*Lethenteron japonicum*). *Proc Natl*  
673 *Acad Sci*. 2013;110: 16044–16049.
- 674 26. Xu P, Xu J, Liu G, Chen L, Zhou Z, Peng W, et al. The allotetraploid origin and  
675 asymmetrical genome evolution of the common carp *Cyprinus carpio*. *Nat Commun*.  
676 2019;10: 4625.
- 677 27. Berthelot C, Brunet F, Chalopin D, Juanchich A, Bernard M, Noël B, et al. The  
678 rainbow trout genome provides novel insights into evolution after whole-genome  
679 duplication in vertebrates. *Nat Commun*. 2014;5: 3657.
- 680 28. Lien S, Koop BF, Sandve SR, Miller JR, Kent MP, Nome T, et al. The Atlantic  
681 salmon genome provides insights into rediploidization. *Nature*. 2016;533: 200–205.

- 682 29. Braasch I, Gehrke AR, Smith JJ, Kawasaki K, Manousaki T, Pasquier J, et al. The  
683 spotted gar genome illuminates vertebrate evolution and facilitates human-teleost  
684 comparisons. *Nat Genet.* 2016;48: 427–437.
- 685 30. Gibbins IL, Olsson C, Holmgren S. Distribution of neurons reactive for NADPH-  
686 diaphorase in the branchial nerves of a teleost fish, *Gadus morhua*. *Neurosci Lett.*  
687 1995;193: 113–116.
- 688 31. Mauceri A, Fasulo S, Ainis L, Licata A, Rita Lauriano E, Martfnez A, et al. Neuronal  
689 nitric oxide synthase (nNOS) expression in the epithelial neuroendocrine cell system  
690 and nerve fibers in the gill of the catfish, *Heteropneustes fossilis*. *Acta Histochem.*  
691 1999;101: 437–448.
- 692 32. Fritsche R, Schwerte T, Pelster B. Nitric oxide and vascular reactivity in developing  
693 zebrafish, *Danio rerio*. *Am J Physiol Integr Comp Physiol.* 2000;279: R2200–R2207.
- 694 33. Evans DH. Cell signaling and ion transport across the fish gill epithelium. *J Exp Zool.*  
695 2002;293: 336–347.
- 696 34. Haraldsen L, Söderström-Lauritzsen V, Nilsson GE. Oxytocin stimulates cerebral  
697 blood flow in rainbow trout (*Oncorhynchus mykiss*) through a nitric oxide dependent  
698 mechanism. *Brain Res.* 2002;929: 10–14.
- 699 35. Pellegrino D, Sprovieri E, Mazza R, Randall D., Tota B. Nitric oxide-cGMP-mediated  
700 vasoconstriction and effects of acetylcholine in the branchial circulation of the eel.  
701 *Comp Biochem Physiol Part A Mol Integr Physiol.* 2002;132: 447–457.
- 702 36. Gillis JA, Tidswell ORA. The Origin of Vertebrate Gills. *Curr Biol.* 2017;27: 729–732.
- 703 37. Warga RM, Nüsslein-Volhard C. Origin and development of the zebrafish endoderm.  
704 *Development.* 1999;126: 827–38.
- 705 38. Poon K-L, Richardson M, Korzh V. Expression of zebrafish *nos2b* surrounds oral  
706 cavity. *Dev Dyn.* 2008;237: 1662–1667.

- 707 39. Lepiller S, Franche N, Solary E, Chluba J, Laurens V. Comparative analysis of  
708 zebrafish *nos2a* and *nos2b* genes. *Gene*. 2009;445: 58–65.
- 709 40. Lind M, Hayes A, Caprnda M, Petrovic D, Rodrigo L, Kruzliak P, et al. Inducible nitric  
710 oxide synthase: Good or bad? *Biomed Pharmacother*. 2017;93: 370–375.
- 711 41. Dehal P, Boore JL. Two Rounds of Whole Genome Duplication in the Ancestral  
712 Vertebrate. Holland P, editor. *PLoS Biol*. 2005;3: e314.
- 713 42. Tota B, Amelio D, Cerra MC, Garofalo F. The morphological and functional  
714 significance of the NOS/NO system in the respiratory, osmoregulatory, and  
715 contractile organs of the African lungfish. *Acta Histochem*. 2018;120: 654–666.
- 716 43. Tipsmark CK. Regulation of Na<sup>+</sup>/K<sup>+</sup>-ATPase activity by nitric oxide in the kidney and  
717 gill of the brown trout (*Salmo trutta*). *J Exp Biol*. 2003;206: 1503–1510.
- 718 44. Ebbesson LOE. Nitric oxide synthase in the gill of Atlantic salmon: colocalization  
719 with and inhibition of Na<sup>+</sup>,K<sup>+</sup>-ATPase. *J Exp Biol*. 2005;208: 1011–1017.
- 720 45. Hyndman KA, Choe KP, Havird JC, Rose RE, Piermarini PM, Evans DH. Neuronal  
721 nitric oxide synthase in the gill of the killifish, *Fundulus heteroclitus*. *Comp Biochem*  
722 *Physiol Part B Biochem Mol Biol*. 2006;144: 510–519.
- 723 46. Campos-Perez JJ, Ward M, Grabowski PS, Ellis AE, Secombes CJ. The gills are an  
724 important site of iNOS expression in rainbow trout *Oncorhynchus mykiss* after  
725 challenge with the Gram-positive pathogen *Renibacterium salmoninarum*.  
726 *Immunology*. 2000;99: 153–161.
- 727 47. Mistri A, Kumari U, Mittal S, Mittal AK. Immunohistochemical localization of nitric  
728 oxide synthase (NOS) isoforms in epidermis and gill epithelium of an angler catfish,  
729 *Chaca chaca* (Siluriformes, Chacidae). *Tissue Cell*. 2018;55: 25–30.
- 730 48. Force A, Lynch M, Pickett FB, Amores A, Yan YL, Postlethwait J. Preservation of  
731 duplicate genes by complementary, degenerative mutations. *Genetics*. 1999;151:

- 732 1531–45.
- 733 49. Farnsworth DR, Saunders LM, Miller AC. A single-cell transcriptome atlas for  
734 zebrafish development. *Dev Biol.* 2020;459: 100–108.
- 735 50. Stundl J, Pospisilova A, Jandzik D, Fabian P, Dobiasova B, Minarik M, et al. Bichir  
736 external gills arise via heterochronic shift that accelerates hyoid arch development.  
737 *Elife.* 2019;8: e43531.
- 738 51. Annona G, Caccavale F, Pascual-Anaya J, Kuratani S, De Luca P, Palumbo A, et al.  
739 Nitric Oxide regulates mouth development in amphioxus. *Sci Rep.* 2017;7: 8432.
- 740 52. Caccavale F, Annona G, Subirana L, Escriva H, Bertrand S, D’Aniello S. Crosstalk  
741 between Nitric Oxide and Retinoic Acid pathways is essential for amphioxus pharynx  
742 development. *bioRxiv.* 2020.
- 743 53. Altschul S. Gapped BLAST and PSI-BLAST: a new generation of protein database  
744 search programs. *Nucleic Acids Res.* 1997;25: 3389–3402.
- 745 54. Smith JJ, Timoshevskaya N, Ye C, Holt C, Keinath MC, Parker HJ, et al. The sea  
746 lamprey germline genome provides insights into programmed genome  
747 rearrangement and vertebrate evolution. *Nat Genet.* 2018;50: 270–277.
- 748 55. Madeira F, Park YM, Lee J, Buso N, Gur T, Madhusoodanan N, et al. The EMBL-  
749 EBI search and sequence analysis tools APIs in 2019. *Nucleic Acids Res.* 2019;47:  
750 W636–W641.
- 751 56. Pascual-Anaya J, Sato I, Sugahara F, Higuchi S, Paps J, Ren Y, et al. Hagfish and  
752 lamprey Hox genes reveal conservation of temporal colinearity in vertebrates. *Nat*  
753 *Ecol Evol.* 2018;2: 859–866.
- 754 57. Edgar RC. MUSCLE: multiple sequence alignment with high accuracy and high  
755 throughput. *Nucleic Acids Res.* 2004;32: 1792–1797.
- 756 58. Kumar S, Stecher G, Li M, Knyaz C, Tamura K. MEGA X: Molecular Evolutionary

- 757 Genetics Analysis across Computing Platforms. Battistuzzi FU, editor. *Mol Biol Evol.*  
758 2018;35: 1547–1549.
- 759 59. Capella-Gutierrez S, Silla-Martinez JM, Gabaldon T. trimAl: a tool for automated  
760 alignment trimming in large-scale phylogenetic analyses. *Bioinformatics.* 2009;25:  
761 1972–1973.
- 762 60. Ronquist F, Teslenko M, van der Mark P, Ayres DL, Darling A, Höhna S, et al.  
763 MrBayes 3.2: Efficient Bayesian Phylogenetic Inference and Model Choice Across a  
764 Large Model Space. *Syst Biol.* 2012;61: 539–542.
- 765 61. Nguyen NTT, Vincens P, Roest Crollius H, Louis A. Genomicus 2018: karyotype  
766 evolutionary trees and on-the-fly synteny computing. *Nucleic Acids Res.* 2018;46:  
767 D816–D822.
- 768 62. Catchen JM, Conery JS, Postlethwait JH. Automated identification of conserved  
769 synteny after whole-genome duplication. *Genome Res.* 2009;19: 1497–1505.
- 770 63. Braasch I, Guiguen Y, Loker R, Letaw JH, Ferrara A, Bobe J, et al. Connectivity of  
771 vertebrate genomes: Paired-related homeobox (Prrx) genes in spotted gar, basal  
772 teleosts, and tetrapods. *Comparative Biochemistry and Physiology Part - C:*  
773 *Toxicology and Pharmacology.* 2014. pp. 24–36.
- 774 64. Long WL, Ballard WW. Normal embryonic stages of the longnose gar, *Lepisosteus*  
775 *osseus.* *BMC Dev Biol.* 2001;1: 1–8.
- 776 65. Sugahara F, Murakami Y, Kuratani S. Gene Expression Analysis of Lamprey  
777 Embryos. In *Situ Hybridization Methods.* 2015. pp. 263–278.
- 778 66. Tahara Y. Normal stages of development in the lamprey, *Lampetra reissneri*  
779 (*Dybowski*). *Zoolog Sci.* 1988;5: p109-118.
- 780 67. Adachi N, Kuratani S. Development of head and trunk mesoderm in the dogfish,  
781 *Scyliorhinus torazame* : I. Embryology and morphology of the head cavities and

- 782 related structures. *Evol Dev.* 2012;14: 234–256.
- 783 68. Ballard WW, Mellinger J, Lechenault H. A series of normal stages for development  
784 of *Scyliorhinus canicula*, the lesser spotted dogfish (Chondrichthyes: Scyliorhinidae).  
785 *J Exp Zool.* 1993;267: 318–336.
- 786 69. Diedhiou S, Bartsch P. Staging of the Early Development of Polypterus (Cladistia:  
787 Actinopterygii). *Development of Non-teleost Fishes.* Science Publishers; 2009. pp.  
788 104–169.
- 789 70. Dettlaff TA, Ginsburg AS, Schmalhausen OI. *Sturgeon Fishes - Developmental  
790 Biology and Aquaculture.* 1st ed. Berlin, Heidelberg: Springer Berlin Heidelberg;  
791 1993.
- 792 71. Jowett T, Yan Y-L. Double fluorescent in situ hybridization to zebrafish embryos.  
793 *Trends Genet.* 1996;12: 387–389.
- 794 72. Minarik M, Stundl J, Fabian P, Jandzik D, Metscher BD, Psenicka M, et al. Pre-oral  
795 gut contributes to facial structures in non-teleost fishes. *Nature.* 2017;547: 209–212.
- 796 73. Adachi N, Takechi M, Hirai T, Kuratani S. Development of the head and trunk  
797 mesoderm in the dogfish, *Scyliorhinus torazame* : II. Comparison of gene expression  
798 between the head mesoderm and somites with reference to the origin of the  
799 vertebrate head. *Evol Dev.* 2012;14: 257–276.
- 800 74. Strähle U, Blader P, Adam J, Ingham PW. A simple and efficient procedure for non-  
801 isotopic in situ hybridization to sectioned material. *Trends Genet.* 1994;10: 75–76.
- 802 75. Jowett T, Ingham PW, Henrique D, Lettice L, Wilkinson D, Yan YL. An EMBO  
803 practical course. Univ Newcastle, Newcastle. 1995; 50.
- 804
